# Supplementary material for: The Measurement Invariance of the Short Dark Triad
Source: Atypon-hosted journal article supplement (doi:10.1027/1614-0001/a000322), 2020-05-13
Supplement: 1614-0001_a000322_esm1.pdf [file 1614-0001_a000322_esm1.pdf]

### Electronic Supplementary Material 1

Table E1.

*Descriptive Statistics for the study variables for the high- and low-stake samples*

| Scale            | Low-stake sample |       |      | High-stake sample |       |      |
|------------------|------------------|-------|------|-------------------|-------|------|
|                  | $\alpha$         | $M$   | $SD$ | $\alpha$          | $M$   | $SD$ |
| Machiavellianism | .80              | 31.89 | 5.94 | .68               | 26.31 | 5.07 |
| Narcissism       | .83              | 28.59 | 5.66 | .60               | 27.01 | 4.14 |
| Psychopathy      | .82              | 24.04 | 5.85 | .65               | 14.63 | 3.91 |

Table E2.

*Differential Item Functioning (DIF) results*

| Item                                                                                 | No. cat. | Uniform DIF | PseudoR <sup>2</sup> Nonuniform DIF | McFadden Overall DIF | β1 change |
|--------------------------------------------------------------------------------------|----------|-------------|-------------------------------------|----------------------|-----------|
| Machiavellianism                                                                     |          |             |                                     |                      |           |
| 1 <b>It's not wise to tell your secrets</b>                                          | 5        | .043        | .019                                | .063                 | .844      |
| 2 <b>Generally speaking, people won't work hard unless they have to</b>              | 4        | .011        | .013                                | .024                 | .146      |
| 3 Whatever it takes, you must get the important people on your side                  | 4        | .000        | .002                                | .002                 | .016      |
| 4 <b>Avoid direct conflict with others because they may be useful in the future</b>  | 5        | .029        | .010                                | .039                 | .243      |
| 5 It's wise to keep track of information that you can use against people later       | 5        | .010        | .004                                | .015                 | .034      |
| 6 <b>You should wait for the right time to get back at people</b>                    | 4        | .105        | .050                                | .156                 | .070      |
| 7 There are things you should hide from other people because they don't need to know | 5        | .000        | .000                                | .000                 | .001      |
| 8 <b>Make sure your plans benefit you, not others</b>                                | 4        | .039        | .000                                | .040                 | .454      |
| 9 <b>There's a sucker born every minute</b>                                          | 4        | .121        | .021                                | .143                 | .164      |
| 10 <b>Most people deserve respect</b>                                                | 4        | .126        | .006                                | .133                 | .153      |
| Narcissism                                                                           |          |             |                                     |                      |           |

|             |                                                               |          |             |             |             |             |
|-------------|---------------------------------------------------------------|----------|-------------|-------------|-------------|-------------|
| 1           | People see me as a natural leader                             | 5        | .001        | .008        | .009        | .014        |
| 2           | <b>I hate being the center of attention</b>                   | <b>5</b> | <b>.028</b> | <b>.010</b> | <b>.037</b> | <b>.173</b> |
| 3           | Many group activities tend to be dull without me              | 5        | .009        | .001        | .010        | .050        |
| 4           | I know that I am special because everyone keeps telling me so | 5        | .002        | .002        | .004        | .019        |
| 5           | <b>I like to get acquainted with important people</b>         | <b>5</b> | <b>.040</b> | <b>.011</b> | <b>.050</b> | <b>.235</b> |
| 6           | <b>I feel embarrassed if someone compliments me</b>           | <b>4</b> | <b>.059</b> | <b>.047</b> | <b>.106</b> | <b>.462</b> |
| 7           | I have been compared to famous people                         | 5        | .000        | .000        | .000        | .007        |
| 8           | <b>I am an average person</b>                                 | <b>3</b> | <b>.180</b> | <b>.005</b> | <b>.185</b> | <b>.034</b> |
| 9           | <b>I insist on getting the respect that I deserve</b>         | <b>5</b> | <b>.082</b> | <b>.017</b> | <b>.099</b> | <b>.519</b> |
| Psychopathy |                                                               |          |             |             |             |             |
| 1           | <b>I like to get revenge on authorities</b>                   | <b>4</b> | <b>.016</b> | <b>.000</b> | <b>.016</b> | <b>.125</b> |
| 2           | <b>I avoid dangerous situations</b>                           | <b>4</b> | <b>.007</b> | <b>.037</b> | <b>.044</b> | <b>.341</b> |
| 3           | <b>Payback needs to be quick and nasty</b>                    | <b>3</b> | <b>.018</b> | <b>.028</b> | <b>.046</b> | <b>.129</b> |
| 4           | People often say I'm out of control                           | 3        | .004        | .000        | .004        | .085        |
| 5           | It's true that I can be mean to others                        | 4        | .000        | .003        | .003        | .017        |
| 6           | <b>People who mess with me always regret it</b>               | <b>5</b> | <b>.004</b> | <b>.002</b> | <b>.006</b> | <b>.106</b> |
| 7           | I have never gotten into trouble with the law                 | 4        | .000        | .018        | .018        | .007        |
| 8           | I like to pick on losers                                      | 3        | .005        | .002        | .006        | .059        |
| 9           | I'll say anything to get what I want                          | 4        | .000        | .000        | .000        | .017        |

---

<https://doi.org/10.1027/1614-0001/a000322>

*Note.* Flagged DIF items are marked in boldface (criteria for flagging items: Pseudo R2 McFadden  $>.02$  or relative  $\beta_1$  change  $>.10$ ); No. cat. = number of response categories for each item; Uniform DIF: obtained by comparing the log likelihood values for Models 1 and 2; Non-uniform DIF: obtained by comparing the log likelihood values for Models 2 and 3; Overall DIF: obtained by comparing the log likelihood values for Models 1 and 3.

Table E3.

*IRT parameters of the Short Dark Triad (SD3) items across low- and high-stake samples*

| Item             | Group | a    | b1      | b2     | b3     | b4    |
|------------------|-------|------|---------|--------|--------|-------|
| Machiavellianism |       |      |         |        |        |       |
| 1                | Low   | 0.94 | -3.93   | -1.65  | -0.34  | 2.17  |
|                  | High  | 0.03 | -125.43 | -76.88 | -44.80 | 34.66 |
| 2                | Low   | 1.39 | -5.22   | -1.40  | -0.28  | 1.53  |
|                  | High  | 0.61 | -5.05   | -1.67  | -0.53  | 3.70  |
| 3                | Low   | 1.61 | -3.80   | -1.37  | -0.27  | 1.49  |
|                  | High  | 1.02 | -2.24   | -0.44  | 0.98   | 2.92  |
| 4                | Low   | 1.62 | -3.22   | -1.12  | -0.08  | 1.54  |
|                  | High  | 0.61 | -4.60   | -2.13  | -0.53  | 3.16  |
| 5                | Low   | 1.93 | -2.58   | -0.62  | 0.35   | 1.67  |
|                  | High  | 1.96 | -0.71   | 0.69   | 1.53   | 2.64  |
| 6                | Low   | 1.03 | -3.61   | -0.13  | 1.38   | 3.30  |
|                  | High  | 2.92 | 0.47    | 1.35   | 2.24   | 3.48  |
| 7                | Low   | 1.62 | -3.14   | -0.79  | 0.15   | 1.61  |
|                  | High  | 1.29 | -1.45   | 0.05   | 1.07   | 3.06  |
| 8                | Low   | 0.92 | -7.33   | -1.15  | 0.58   | 2.65  |
|                  | High  | 0.76 | -3.48   | -1.52  | -0.33  | 2.51  |
| 9                | Low   | 0.80 | -4.92   | 0.61   | 2.61   | 5.26  |
|                  | High  | 1.64 | 0.52    | 2.12   | 3.17   | 4.05  |
| 10               | Low   | 1.52 | -3.39   | -0.68  | 0.47   | 2.07  |
|                  | High  | 0.73 | -0.22   | 3.96   | 5.15   | NA    |
| Narcissism       |       |      |         |        |        |       |
| 1                | Low   | 1.18 | -4.14   | -0.73  | 0.70   | 2.60  |
|                  | High  | 1.61 | -1.41   | -0.09  | 1.26   | 2.77  |
| 2                | Low   | 1.40 | -3.70   | -0.93  | 0.38   | 1.83  |
|                  | High  | 0.63 | -5.84   | -2.70  | 0.08   | 3.30  |
| 3                | Low   | 0.94 | -4.40   | -0.77  | 0.77   | 2.72  |
|                  | High  | 1.23 | -1.96   | 0.34   | 1.68   | 4.21  |
| 4                | Low   | 2.29 | -2.29   | -0.45  | 0.64   | 2.03  |
|                  | High  | 2.00 | -1.60   | 0.05   | 1.14   | 2.71  |
| 5                | Low   | 1.20 | -4.50   | -1.54  | -0.27  | 1.67  |
|                  | High  | 0.60 | -6.47   | -4.52  | -2.07  | 2.81  |
| 6                | Low   | 1.41 | -4.42   | -1.38  | -0.04  | 1.61  |
|                  | High  | 0.04 | -152.63 | -67.07 | -30.10 | 26.25 |
| 7                | Low   | 1.70 | -2.97   | -0.66  | 0.54   | 1.97  |
|                  | High  | 1.22 | -2.04   | 0.00   | 1.20   | 3.48  |
| 8                | Low   | 1.43 | -4.14   | -0.78  | 0.57   | 2.28  |
|                  | High  | 0.66 | -0.60   | 4.14   | 5.21   | 8.57  |
| 9                | Low   | 1.53 | -3.33   | -0.71  | 0.51   | 2.05  |
|                  | High  | 0.37 | -8.39   | -4.81  | -2.43  | 3.44  |

Psychopathy

|   |      |      |       |       |      |      |
|---|------|------|-------|-------|------|------|
| 1 | Low  | 1.33 | -2.72 | -0.07 | 1.36 | 3.48 |
|   | High | 1.81 | 0.64  | 2.41  | 2.94 | 3.49 |
| 2 | Low  | 1.35 | NA    | -0.90 | 0.38 | 2.09 |
|   | High | 0.23 | -6.59 | 0.31  | 3.50 | 9.86 |
| 3 | Low  | 1.17 | -2.25 | 0.47  | 1.69 | 3.27 |
|   | High | 3.58 | 0.88  | 2.01  | NA   | NA   |
| 4 | Low  | 1.66 | -1.49 | 0.46  | 1.41 | 2.77 |
|   | High | 2.63 | 0.47  | 2.02  | 3.05 | 3.39 |
| 5 | Low  | 1.09 | -2.23 | 0.15  | 1.24 | 2.75 |
|   | High | 2.37 | 0.27  | 1.76  | 2.10 | 3.00 |
| 6 | Low  | 1.42 | -2.19 | 0.35  | 1.47 | 2.97 |
|   | High | 1.66 | 0.07  | 1.63  | 2.39 | 3.25 |
| 7 | Low  | 1.68 | NA    | -0.31 | 0.75 | 1.95 |
|   | High | 0.65 | 0.94  | 2.66  | 3.04 | 3.87 |
| 8 | Low  | 1.87 | -1.74 | 0.51  | 1.52 | 2.65 |
|   | High | 2.81 | 0.81  | 2.24  | 5.52 | 2.70 |
| 9 | Low  | 1.38 | -1.92 | -0.14 | 0.97 | 2.59 |
|   | High | 2.09 | 0.30  | 1.69  | 2.53 | 3.24 |

*Note.* *a* = item discrimination; *b* = item severity; NA = category threshold is not applicable because there were no observations in one of the response categories.

Table E4.

*IRT slope-intercept parameters of the Short Dark Triad (SD3) items across low- and high-stake samples*

| Item             | Group | a1   | d1    | d2    | d3    | d4     |
|------------------|-------|------|-------|-------|-------|--------|
| Machiavellianism |       |      |       |       |       |        |
| 1                | Low   | 0.94 | 3.71  | 1.56  | 0.32  | -2.04  |
|                  | High  | 0.03 | 3.38  | 2.07  | 1.21  | -0.94  |
| 2                | Low   | 1.39 | 7.26  | 1.94  | 0.38  | -2.12  |
|                  | High  | 0.61 | 3.08  | 1.01  | 0.32  | -2.30  |
| 3                | Low   | 1.61 | 6.14  | 2.22  | 0.44  | -2.40  |
|                  | High  | 1.02 | 2.29  | 0.45  | -1.01 | -2.99  |
| 4                | Low   | 1.62 | 5.21  | 1.81  | 0.13  | -2.50  |
|                  | High  | 0.61 | 2.81  | 1.30  | 0.33  | -1.93  |
| 5                | Low   | 1.93 | 4.98  | 1.19  | -0.67 | -3.21  |
|                  | High  | 1.96 | 1.39  | -1.36 | -2.99 | -5.14  |
| 6                | Low   | 1.03 | 3.70  | 0.13  | -1.41 | -3.39  |
|                  | High  | 2.92 | -1.37 | -3.93 | -6.53 | -10.17 |
| 7                | Low   | 1.62 | 5.09  | 1.29  | -0.24 | -2.61  |
|                  | High  | 1.29 | 1.87  | -0.07 | -1.38 | -3.96  |
| 8                | Low   | 0.92 | 6.76  | 1.06  | -0.53 | -2.45  |
|                  | High  | 0.76 | 2.65  | 1.16  | 0.25  | -1.91  |
| 9                | Low   | 0.80 | 3.93  | -0.48 | -2.09 | -4.20  |
|                  | High  | 1.64 | -0.85 | -3.48 | -5.20 | -6.63  |
| 10               | Low   | 1.52 | 5.16  | 1.04  | -0.71 | -3.15  |
|                  | High  | 0.73 | 0.16  | -2.61 | -3.73 | NA     |
| Narcissism       |       |      |       |       |       |        |
| 1                | Low   | 1.18 | 4.89  | 0.86  | -0.82 | -3.07  |
|                  | High  | 1.61 | 2.26  | 0.15  | -2.02 | -4.45  |
| 2                | Low   | 1.40 | 5.16  | 1.29  | -0.54 | -2.56  |
|                  | High  | 0.63 | 3.68  | 1.70  | -0.05 | -2.08  |
| 3                | Low   | 0.94 | 4.12  | 0.72  | -0.72 | -2.55  |
|                  | High  | 1.23 | 2.41  | -0.42 | -2.07 | -5.18  |
| 4                | Low   | 2.29 | 5.25  | 1.02  | -1.46 | -4.66  |
|                  | High  | 2.00 | 3.21  | -0.09 | -2.28 | -5.42  |
| 5                | Low   | 1.20 | 5.42  | 1.86  | 0.33  | -2.01  |
|                  | High  | 0.58 | 3.75  | 2.62  | 1.20  | -1.63  |
| 6                | Low   | 1.41 | 6.24  | 1.95  | 0.06  | -2.27  |
|                  | High  | 0.04 | 6.12  | 2.69  | 1.21  | -1.05  |
| 7                | Low   | 1.70 | 5.04  | 1.12  | -0.91 | -3.34  |
|                  | High  | 1.22 | 2.49  | 0.00  | -1.47 | -4.24  |
| 8                | Low   | 1.43 | 5.94  | 1.12  | -0.82 | -3.27  |
|                  | High  | 0.66 | 0.39  | -2.63 | -3.42 | -5.62  |

|             |      |      |       |       |       |       |
|-------------|------|------|-------|-------|-------|-------|
| 9           | Low  | 1.53 | 5.09  | 1.09  | -0.78 | -3.14 |
|             | High | 0.37 | 3.14  | 1.80  | 0.91  | -1.29 |
| Psychopathy |      |      |       |       |       |       |
| 1           | Low  | 1.33 | 3.62  | 0.09  | -1.80 | -4.62 |
|             | High | 1.81 | -1.15 | -4.36 | -5.31 | -6.30 |
| 2           | Low  | 1.35 | NA    | 1.21  | -0.52 | -2.82 |
|             | High | 0.23 | 1.53  | -0.07 | -0.82 | -2.29 |
| 3           | Low  | 1.17 | 2.64  | -0.55 | -1.98 | -3.83 |
|             | High | 3.58 | -3.14 | -7.21 | NA    | NA    |
| 4           | Low  | 1.66 | 2.48  | -0.77 | -2.34 | -4.60 |
|             | High | 2.63 | -1.22 | -5.30 | -8.01 | -8.92 |
| 5           | Low  | 1.09 | 2.43  | -0.16 | -1.35 | -3.00 |
|             | High | 2.37 | -0.64 | -4.17 | -4.99 | -7.12 |
| 6           | Low  | 1.42 | 3.12  | -0.50 | -2.09 | -4.22 |
|             | High | 1.66 | -0.11 | -2.71 | -3.97 | -5.41 |
| 7           | Low  | 1.68 | NA    | 0.52  | -1.19 | -3.28 |
|             | High | 0.65 | -0.61 | -1.73 | -1.98 | -2.52 |
| 8           | Low  | 1.87 | 3.25  | -0.96 | -2.84 | -5.96 |
|             | High | 2.81 | -2.28 | -6.29 | -7.09 | -7.60 |
| 9           | Low  | 1.38 | 2.64  | 0.19  | -1.33 | -3.57 |
|             | High | 2.09 | -0.63 | -3.52 | -5.28 | -6.76 |

*Note.* a1 = item discrimination; d = deviation parameter; NA = category threshold is not applicable because there were no observations in one of the response categories



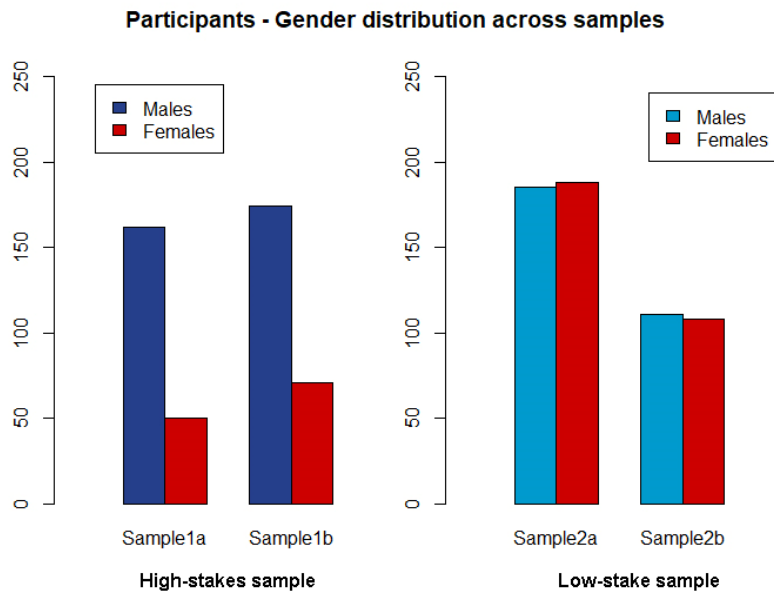

Figure E1. *Gender distribution across samples*

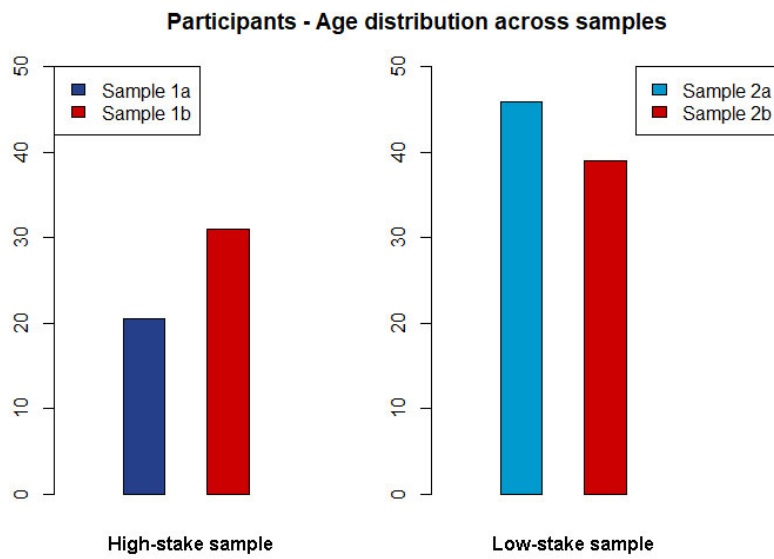

Figure E2. *Age distribution across samples*

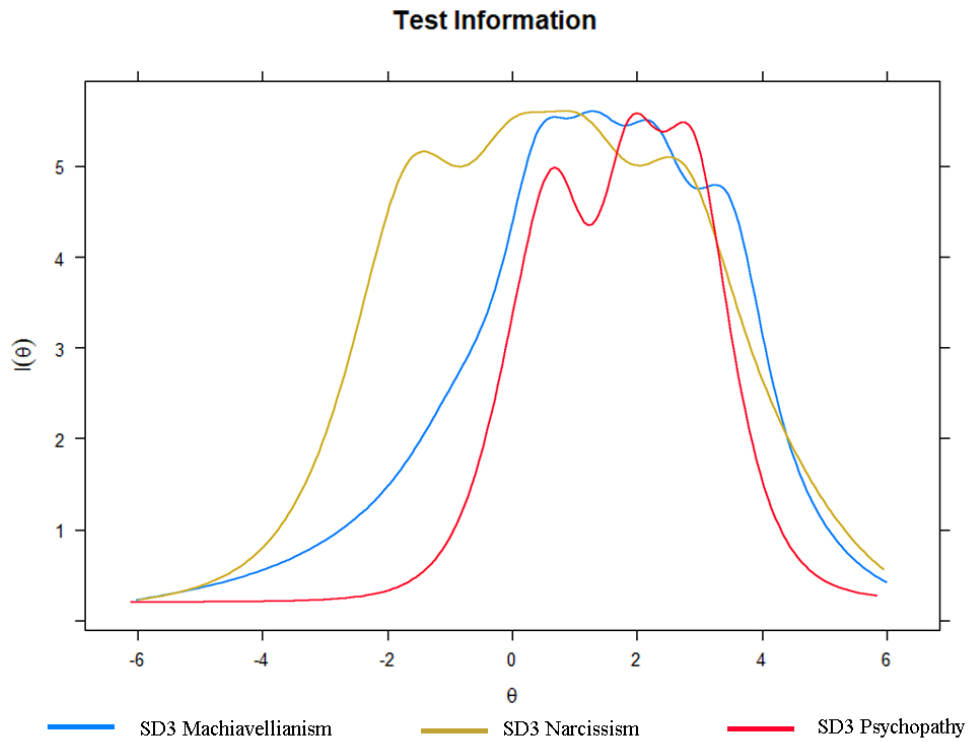

Figure E3. *Scale Information Curve for SD3 traits - High-stake sample*

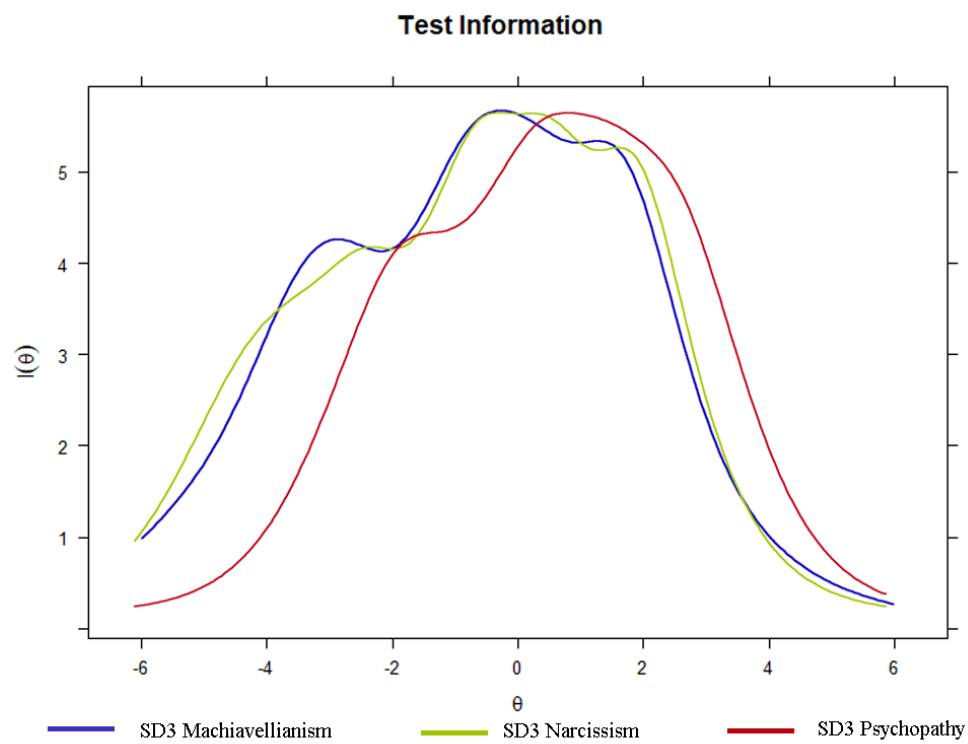

Figure E4. *Scale Information Curve for SD3 traits - Low-stake sample*

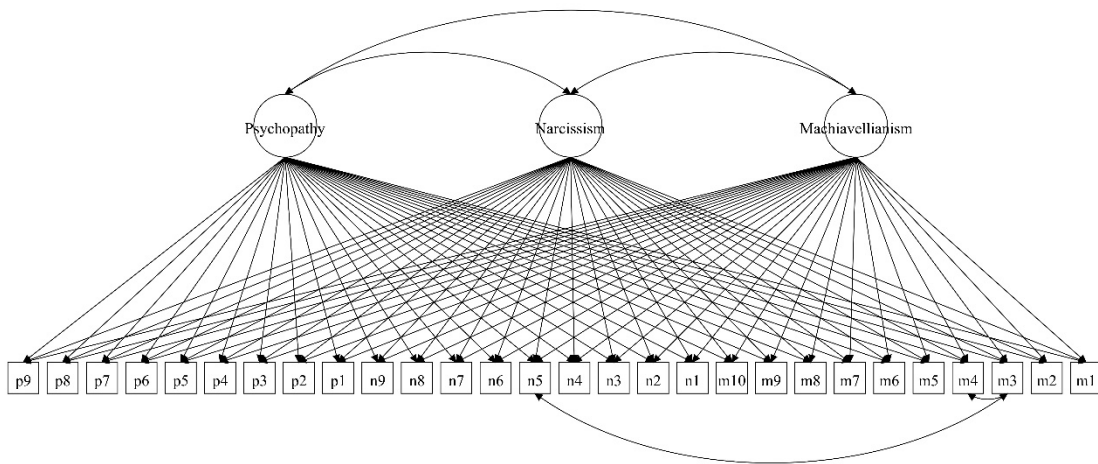

Figure E5. *The revised exploratory structural equation model of SD3 for the high-stake group*

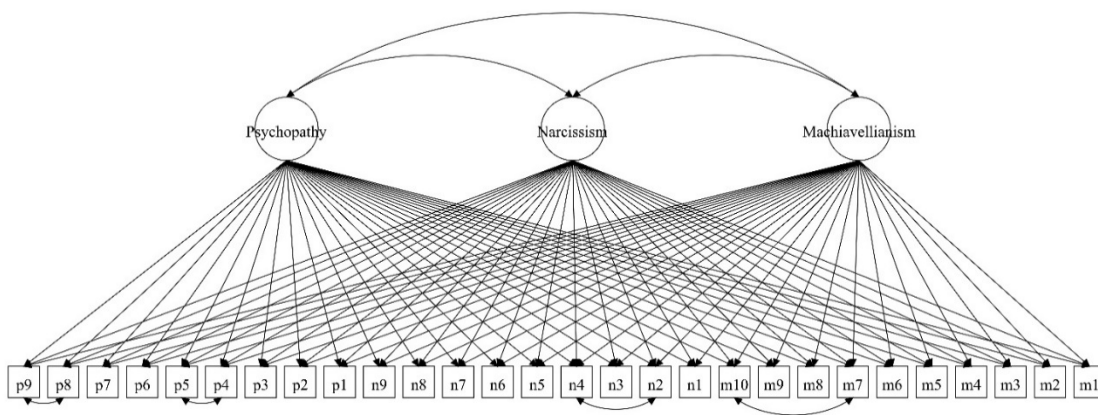

Figure E6. *The revised exploratory structural equation model of SD3 for the low-stake group*
